# Supplementary material for: Nanoscale interface engineering in ZnO twin nanorods for proposed phonon tunnel devices
Source: Royal Society of Chemistry journal article supplement (doi:10.1039/c4cp05369a), 2014-12-24

## Electronic supplementary information

### Nanoscale interface engineering in ZnO twin nanorods for proposed phonon tunnel devices

Avanendra Singh<sup>1</sup>, Kartik Senapati<sup>1\*</sup>, Biswarup Satpati<sup>2</sup>, Mohit Kumar<sup>3</sup>, and Pratap K. Sahoo<sup>1\*</sup>

*We have shown EDX data collected from area 1 (not included in manuscript). Cu and C signal is due to carbon coated Cu-grid. Drift corrected EDX line profile along line 2 was collected while beam of about 1 nm is scanning across about 1400 nm length. In this process X-rays were collected point by point from 300 points in one direction from the STEM-HAADF image shown in figure. Which means we have collected data every  $(1400\text{nm}/300) = 4.6$  nm distance. But in case of EDX and thick sample the interaction volume is large.*

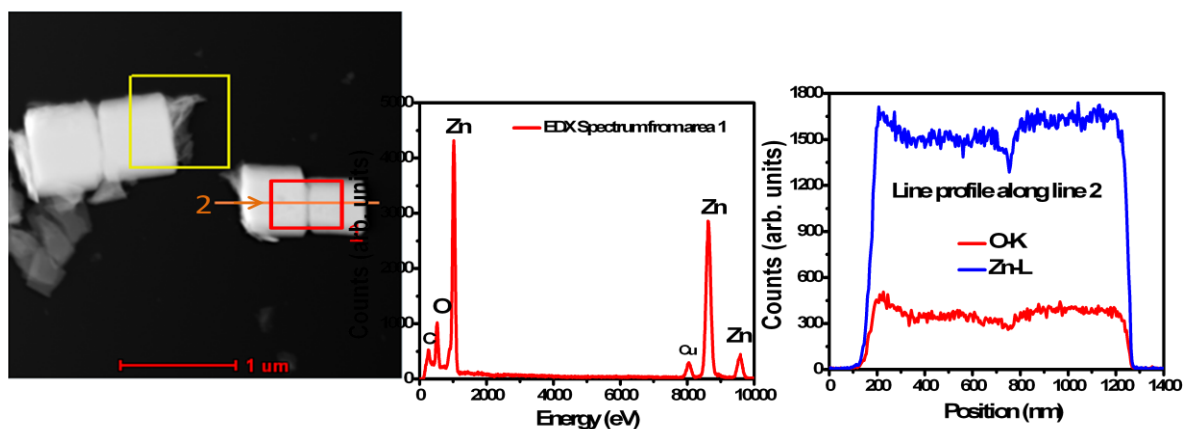

Supplement: c4cp05369a1.pdf [file c4cp05369a1.pdf]
